# Supplementary material for: A vanillin-based copper(ii) metal complex with a DNA-mediated apoptotic activity
Source: Royal Society of Chemistry journal article supplement (doi:10.1039/c8ra03626h), 2018-01-01
Supplement: c8ra03626h1.pdf [file c8ra03626h1.pdf]

## Electronic Supplementary Information

### A vanillin-based copper(II) metal complex with a DNA-mediated apoptotic activity

Wendy M. T. Q. de Medeiros<sup>a</sup>, Mayara J. C. de Medeiros<sup>a</sup>, Edinilton M. Carvalho<sup>b</sup>, Jailma A. de Lima<sup>c</sup>,  
Verônica da S. Oliveira<sup>a</sup>, Ana C. F. de B. Pontes<sup>a</sup>, Francisco O. N. da Silva<sup>a</sup>, Javier A. Ellena<sup>d</sup>, Hugo A.  
de O. Rocha<sup>c</sup>, Eduardo H. S. de Sousa<sup>b</sup> and Daniel de L. Pontes<sup>\*a</sup>

#### Figures S1 – S10

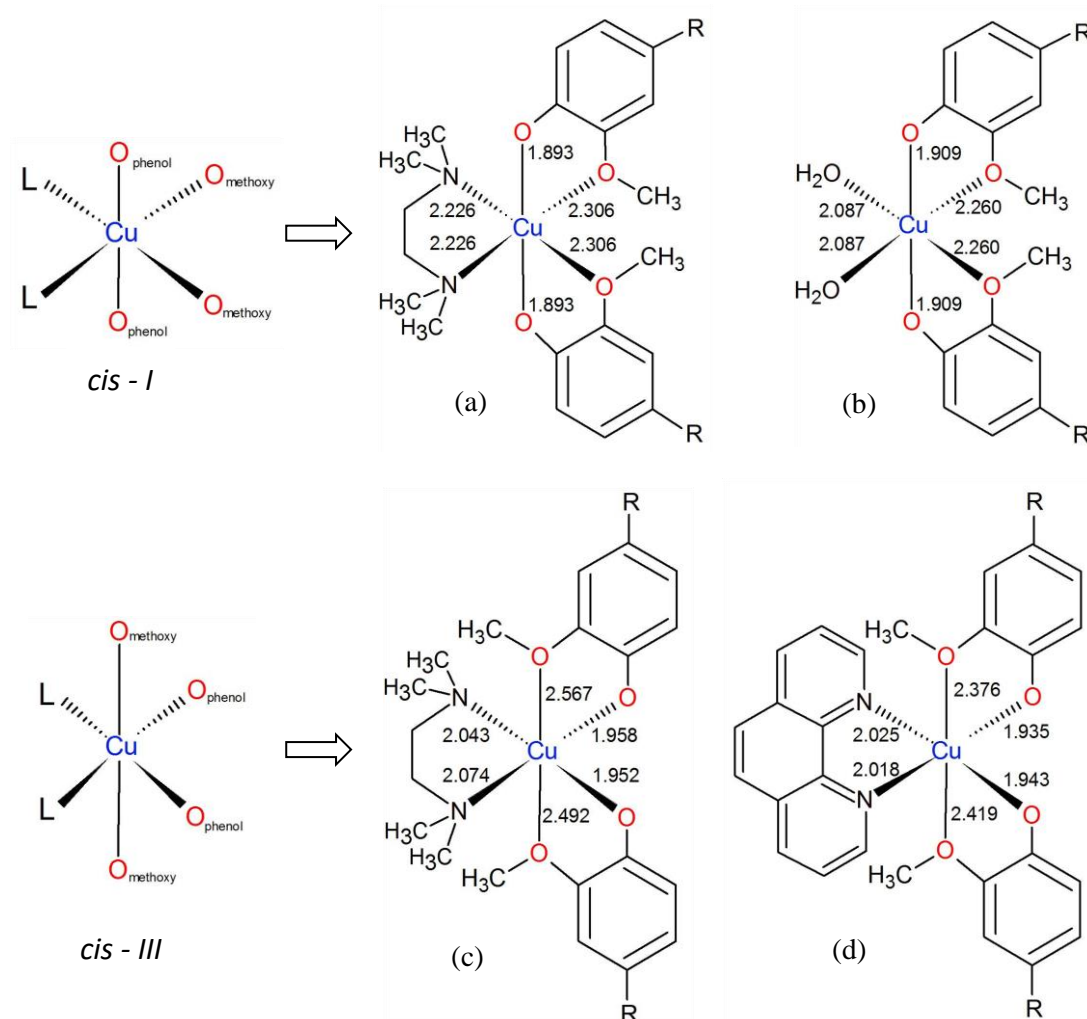

**Figure S1.** Bonding lengths of copper(II) complexes with vanillinate ions (R = aldehyde). (a) L,L = N,N,N',N'-tetramethylethylenediamine; (b) L = H<sub>2</sub>O; (c) L,L = N,N,N',N'-tetramethylethylenediamine; (d) [Cu(phen)(van)<sub>2</sub>] (this work).

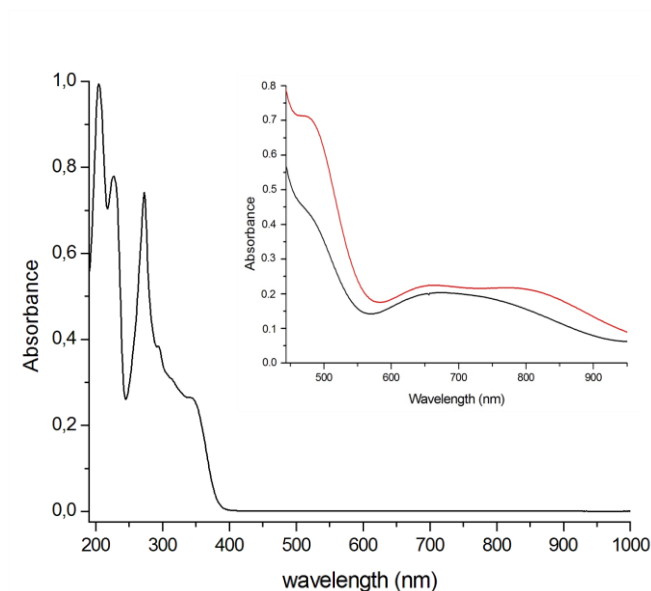

**Figure S2.** Electronic spectra of an aqueous solution of  $[\text{Cu}(\text{phen})(\text{van})_2]$ ,  $2.6 \times 10^{-5} \text{ mol L}^{-1}$ . Inset shows the expanded region of the “d–d” transitions either in water (black trace,  $3.6 \times 10^{-3} \text{ mol L}^{-1}$ ) or in methanol (red trace,  $1.7 \times 10^{-3} \text{ mol L}^{-1}$ ).

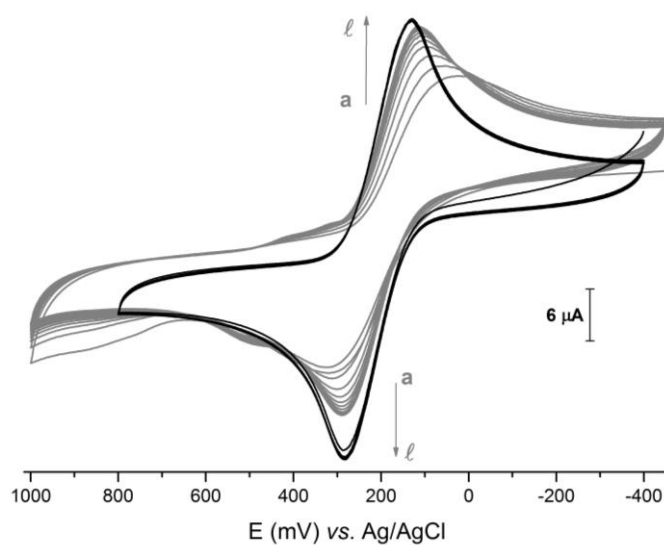

**Figure S3.** Cyclic voltammogram in  $\text{KCl } 0.1 \text{ mol L}^{-1}$ ,  $\text{pH} = 3.5$ , of  $\text{K}_3[\text{Fe}(\text{CN})_6]$  ( $2 \text{ mmol L}^{-1}$ ) obtained before (black curve) and just after (gray curves) conducting five cycles of the  $[\text{Cu}(\text{phen})(\text{van})_2]$  ( $1 \text{ mmol L}^{-1}$ ,  $\text{KCl } 0.1 \text{ mol L}^{-1}$ ,  $\text{pH} = 7.0$ ) and without previously polishing the working electrode.

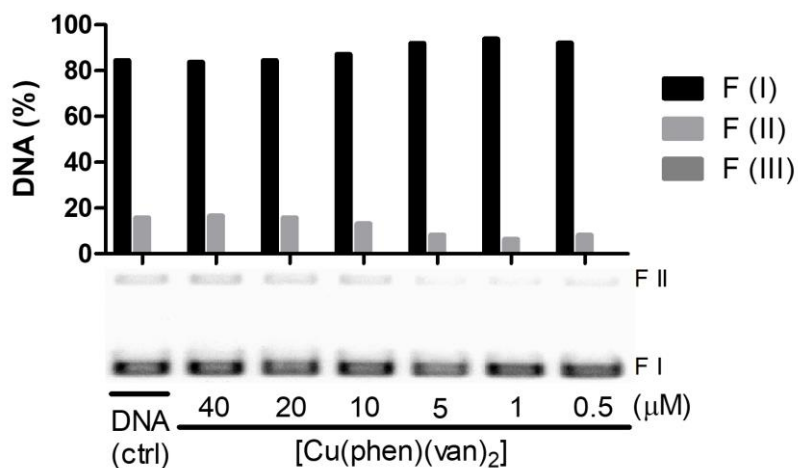

**Figure S4.** DNA cleavage assay employing plasmid DNA pBR322 ( $8.3 \text{ ng } \mu\text{L}^{-1}$  per well) with metal complex  $[\text{Cu}(\text{phen})(\text{van})_2]$ .

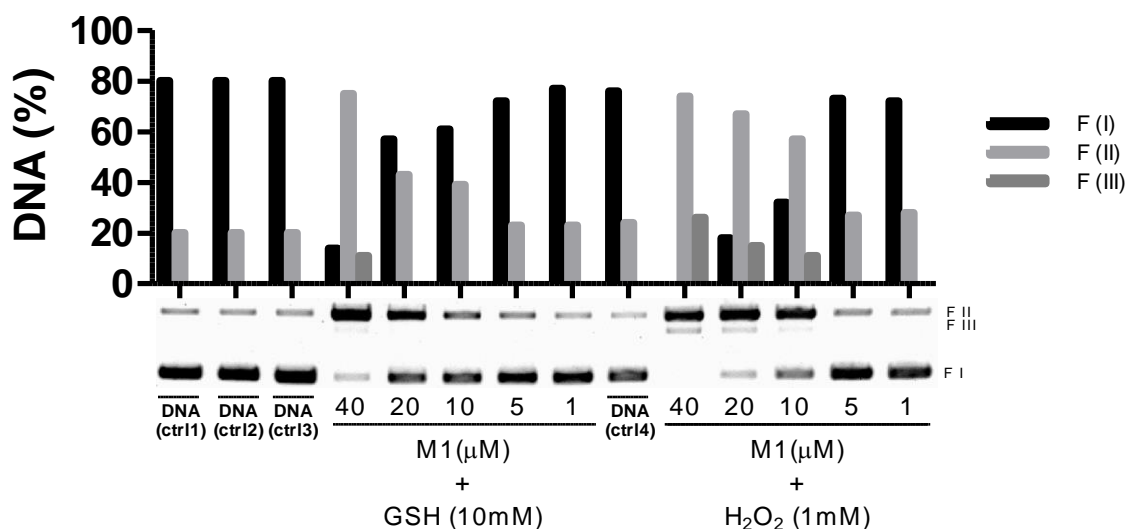

**Figure S5.** DNA cleavage study of copper precursor. It was employed plasmid DNA ( $8.3 \text{ ng } \mu\text{L}^{-1}$  per well) and metal complex M1 at different concentrations (40, 20, 10, 5, and 1  $\mu\text{M}$ ). The reaction occurred in the presence of GSH 10 mM and  $\text{H}_2\text{O}_2$  1 mM, in the dark for 90 minutes at 25 °C. DNA control (ctrl1) contains only DNA; DNA control 2 (ctrl2) contains DNA with M1 complex; DNA control 3 (ctrl3) contains DNA with GSH; DNA control 4 (ctrl4) contains DNA with  $\text{H}_2\text{O}_2$ .

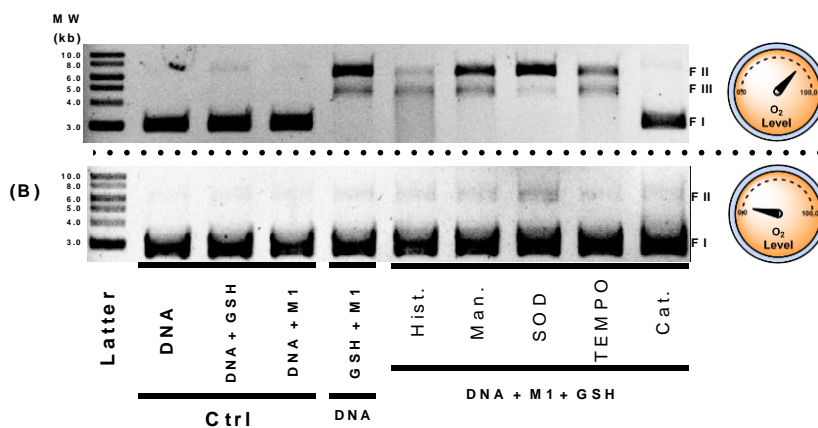

**Figure S6.** Mechanistic study of oxidizing species involved in the DNA cleavage. It was used plasmid DNA ( $8.3 \text{ ng}/\mu\text{L}$  per well), GSH ( $1.5 \text{ mmol L}^{-1}$ ),  $[\text{Cu}(\text{phen})\text{Cl}_2]$  (M1,  $40 \text{ }\mu\text{mol L}^{-1}$ ) along with the inhibitors of free radicals: histidine (hist.,  $13 \text{ mmol L}^{-1}$ ), mannitol (man.,  $13 \text{ mmol L}^{-1}$ ), SOD ( $4 \text{ U }\mu\text{L}^{-1}$ ), TEMPO ( $3.9 \text{ mmol L}^{-1}$ ) e catalase (cat.,  $3.9 \text{ }\mu\text{mol L}^{-1}$ ), in reaction for 60 minutes at  $25 \text{ }^\circ\text{C}$ . Reactions carried out under aerobic (TOP gel) or anaerobic (BOTTOM gel) conditions.

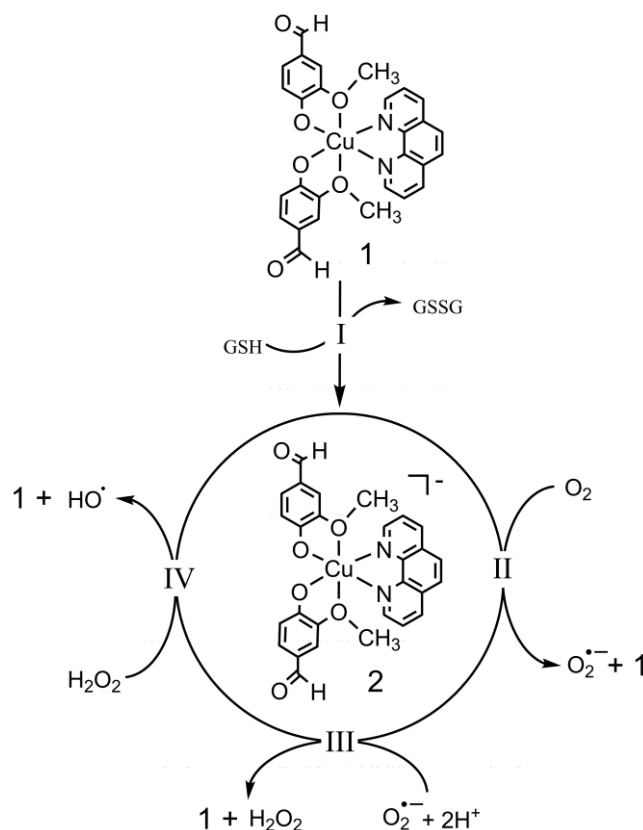

**Figure S7.** Proposed catalytic cycle for reduction of the  $[\text{Cu}(\text{phen})(\text{van})_2]$  (1) complex by GSH with production of superoxide: (I) reduction of Cu(II) by GSH; (II) production of  $\text{O}_2^{\bullet-}$  via re-oxidation of Cu(I); (III) production of  $\text{H}_2\text{O}_2$  via oxidation of Cu(I); and (IV) final production of  $\text{HO}^\bullet$ .

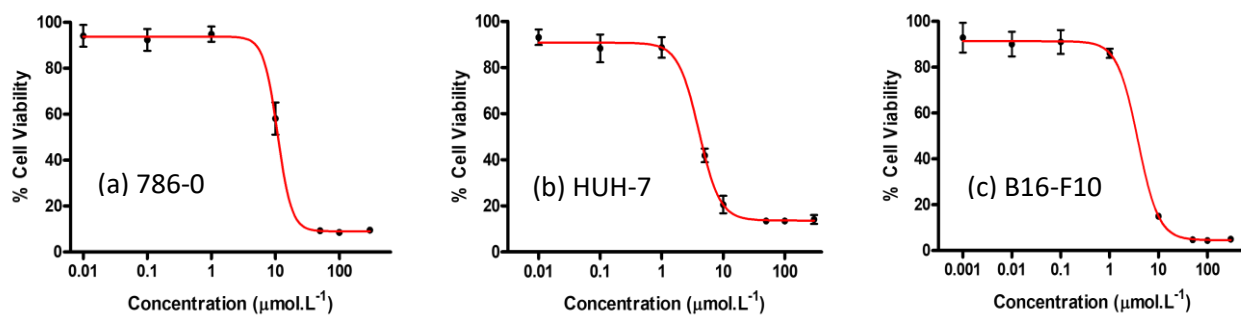

**Figure S8.** Cell viability of [Cu(phen)(van)<sub>2</sub>] for (a) 786-0 (b) HUH-7, (c) B16-F10.

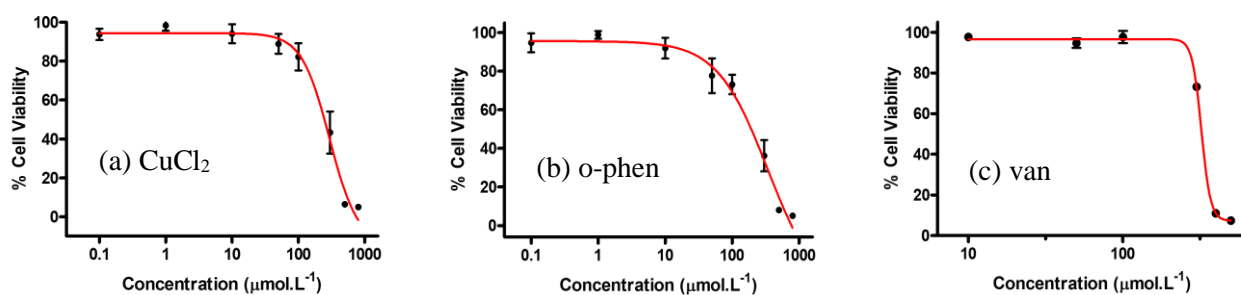

**Figure S9.** Cell viability of (a) CuCl<sub>2</sub> (b) o-phenanthroline and (c) vanillin against 786-0 cell line.

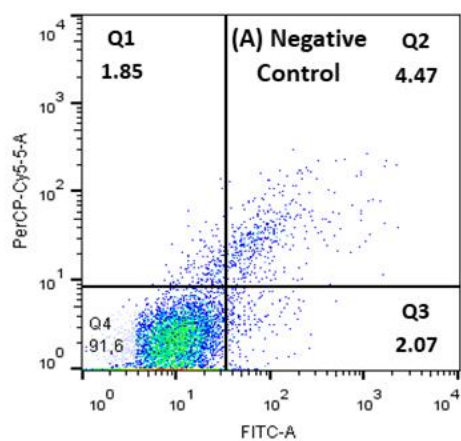

**Figure S10.** Flow cytometry study for untreated 786-0 cells (negative control).

### Tables S1 – S3

**Table S1.** Crystal data and structure refinement parameters.

|                                   |                                                                  |                             |
|-----------------------------------|------------------------------------------------------------------|-----------------------------|
| Empirical formula                 | C <sub>28</sub> H <sub>28</sub> N <sub>2</sub> O <sub>9</sub> Cu |                             |
| Formula weight                    | 600.06                                                           |                             |
| Temperature                       | 293(2) K                                                         |                             |
| Wavelength                        | 0.71073 Å                                                        |                             |
| Crystal system                    | Triclinic                                                        |                             |
| Space group                       | P-1                                                              |                             |
| Unit cell dimensions              | $a = 12.8200(16) \text{ \AA}$                                    | $\alpha = 104.639(6)^\circ$ |
|                                   | $b = 14.9120(16) \text{ \AA}$                                    | $\beta = 92.409(6)^\circ$   |
|                                   | $c = 15.1150(12) \text{ \AA}$                                    | $\gamma = 103.251(6)^\circ$ |
| Volume                            | 2705.9(5) Å <sup>3</sup>                                         |                             |
| Z                                 | 4                                                                |                             |
| Density (calculated)              | 1.473 mg/m <sup>3</sup>                                          |                             |
| Absorption coefficient            | 0.865 mm <sup>-1</sup>                                           |                             |
| F(000)                            | 1244                                                             |                             |
| Crystal size                      | 0.4 x 0.2 x 0.1 mm <sup>3</sup>                                  |                             |
| Theta range for data collection   | 2.787 to 27.532°                                                 |                             |
| Index ranges                      | $-16 \leq h \leq 16, -18 \leq k \leq 19, -19 \leq l \leq 19$     |                             |
| Reflections collected             | 20967                                                            |                             |
| Independent reflections           | 11998 [R(int) = 0.1223]                                          |                             |
| Completeness to theta = 25.242°   | 99.8 %                                                           |                             |
| Absorption correction             | Semi-empirical from equivalents                                  |                             |
| Max. and min. transmission        | 0.743 and 0.625                                                  |                             |
| Refinement method                 | Full-matrix least-squares on F <sup>2</sup>                      |                             |
| Data / restraints / parameters    | 11998 / 0 / 725                                                  |                             |
| Goodness-of-fit on F <sup>2</sup> | 0.889                                                            |                             |
| Final R indices [I > 2σ(I)]       | R1 = 0.0566, wR2 = 0.1028                                        |                             |
| R indices (all data)              | R1 = 0.1324, wR2 = 0.1129                                        |                             |
| Largest diff. peak and hole       | 0.674 and -0.417 e.Å <sup>-3</sup>                               |                             |

**Table S2.** Selected distances (Å) and angles (°) around the copper atom in [Cu(phen)(van)<sub>2</sub>] complex.

|                       |                              |                              |
|-----------------------|------------------------------|------------------------------|
| Cu(1)-O(11): 1.945(2) | O(11)-Cu(1)-O(12): 76.03(9)  | O(21)-Cu(2)-O(22): 74.79(9)  |
| Cu(1)-O(12): 2.377(3) | O(11)-Cu(1)-O(14): 94.9(1)   | O(21)-Cu(2)-O(24): 97.6(1)   |
| Cu(1)-O(14): 1.935(2) | O(11)-Cu(1)-O(15): 88.85(9)  | O(21)-Cu(2)-O(25): 86.20(9)  |
| Cu(1)-O(15): 2.419(3) | O(11)-Cu(1)-N(11): 92.6(1)   | O(21)-Cu(2)-N(21): 91.1(1)   |
| Cu(1)-N(11): 2.017(2) | O(11)-Cu(1)-N(12): 170.5(1)  | O(21)-Cu(2)-N(22): 167.2(1)  |
| Cu(1)-N(12): 2.023(3) | O(12)-Cu(1)-O(14): 90.42(9)  | O(22)-Cu(2)-O(24): 91.00(9)  |
| Cu(2)-O(21): 1.923(3) | O(12)-Cu(1)-O(15): 158.24(8) | O(22)-Cu(2)-O(25): 153.98(8) |
| Cu(2)-O(22): 2.425(2) | O(12)-Cu(1)-N(11): 94.08(9)  | O(22)-Cu(2)-N(21): 98.69(9)  |
| Cu(2)-O(24): 1.926(2) | O(12)-Cu(1)-N(12): 97.9(1)   | O(22)-Cu(2)-N(22): 96.1(1)   |
| Cu(2)-O(25): 2.454(2) | O(14)-Cu(1)-O(15): 75.18(9)  | O(24)-Cu(2)-O(25): 73.80(9)  |
| Cu(2)-N(21): 2.015(2) | O(14)-Cu(1)-N(11): 172.0(1)  | O(24)-Cu(2)-N(21): 168.4(1)  |
| Cu(2)-N(22): 2.022(4) | O(14)-Cu(1)-N(12): 92.4(1)   | O(24)-Cu(2)-N(22): 91.4(1)   |
|                       | O(15)-Cu(1)-N(11): 102.25(9) | O(25)-Cu(2)-N(21): 99.3(1)   |
|                       | O(15)-Cu(1)-N(12): 98.9(1)   | O(25)-Cu(2)-N(22): 105.1(1)  |
|                       | N(11)-Cu(1)-N(12): 80.5(1)   | N(21)-Cu(2)-N(22): 81.3(1)   |

**Table S3.** Electronic transition bands of [Cu(phen)(van)<sub>2</sub>] in aqueous solutions

| Wavelength (nm) | Assignment                                               | Molar Absortivity<br>(L mol <sup>-1</sup> cm <sup>-1</sup> ) |
|-----------------|----------------------------------------------------------|--------------------------------------------------------------|
| 205             | Intraligand, phen ( $\pi \rightarrow \pi^*$ )            | 5.43 x 10 <sup>4</sup>                                       |
| 227             | Intraligand, phen ( $\pi \rightarrow \pi^*$ )            | 4.24 x 10 <sup>4</sup>                                       |
| 273             | Intraligand, phen ( $\pi \rightarrow \pi^*$ )            | 4.04 x 10 <sup>4</sup>                                       |
| 345             | Intraligand, vanillinate ion ( $\pi \rightarrow \pi^*$ ) | 1.45 x 10 <sup>4</sup>                                       |
| 469             | d-d                                                      | 1.25 x 10 <sup>2</sup>                                       |
| 650             | d-d                                                      | 5.53 x 10 <sup>1</sup>                                       |
| 775             | d-d                                                      | 4.78 x 10 <sup>1</sup>                                       |
